# Supplementary material
Source: PubMed Central journal article supplement (PMC4520533)
Supplement: NIHMS516613-supplement-1.pdf [file NIHMS516613-supplement-1.pdf]

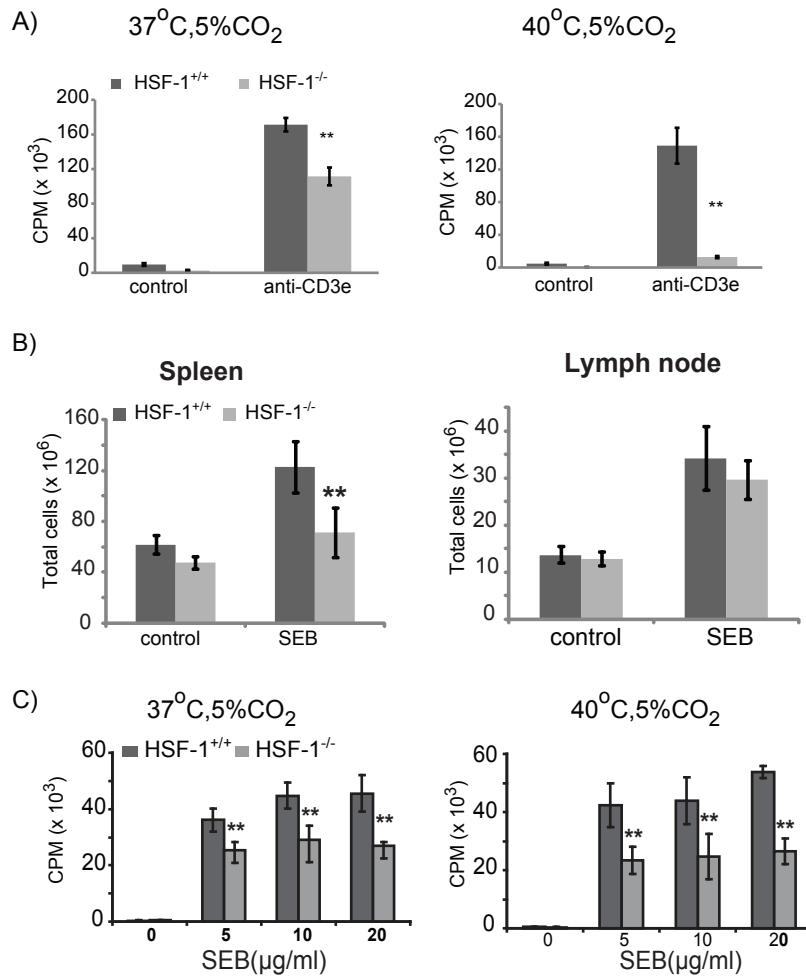

**Figure S1. A) T cells from HSF1<sup>-/-</sup> mice proliferate normally under non-stressful conditions but poorly under stressful conditions in response to anti-CD3 stimulation.** Purified T cells from HSF1<sup>-/-</sup> or HSF1<sup>+/+</sup> mice were stimulated for three days in 96 well tissue culture plates in wells without (control) or with plate-bound anti-CD3 and pulsed with [3H] thymidine deoxyribose for the last 18h. T cell proliferation was estimated as a measure of [3H] thymidine incorporation. Data represents the average of two experiments with three replicates in each. **B) Spleen cell recovery in vivo in response to SEB is reduced in HSF1<sup>-/-</sup> mice compared to HSF1<sup>+/+</sup>:** HSF1<sup>-/-</sup> or HSF1<sup>+/+</sup> mice were injected with PBS(control) or 150 µg SEB and the total number of spleen or draining lymph node lymphocytes after 48h was determined by hemocytometer counting. The data represent the average from 6-8 mice in each treatment. **C) HSF1<sup>-/-</sup> spleen cell proliferation in response to SEB is impaired both at non-stressful and stressful temperatures:** Spleen cells from HSF1<sup>-/-</sup> or HSF1<sup>+/+</sup> mice were cultured in media alone or with indicated concentrations of SEB for 72h in 96 well tissue culture plates at 37°C, 5% [CO<sub>2</sub>] or 40°C, 5% [CO<sub>2</sub>]. The cells were then pulsed with 1µCi [3H] thymidine deoxyribose during the last 18h culture, harvested, and expansion of spleen cells were estimated as a measure of [3H] thymidine incorporation. Data represents the average (n=4) cpm values for each treatment and is a representative of three repeated experiments. Error bars represent the standard error calculated as ±1 standard deviation. P-values were estimated from student's T-test with one-tailed distribution and two-sample unequal variance. \*\*represents P-value

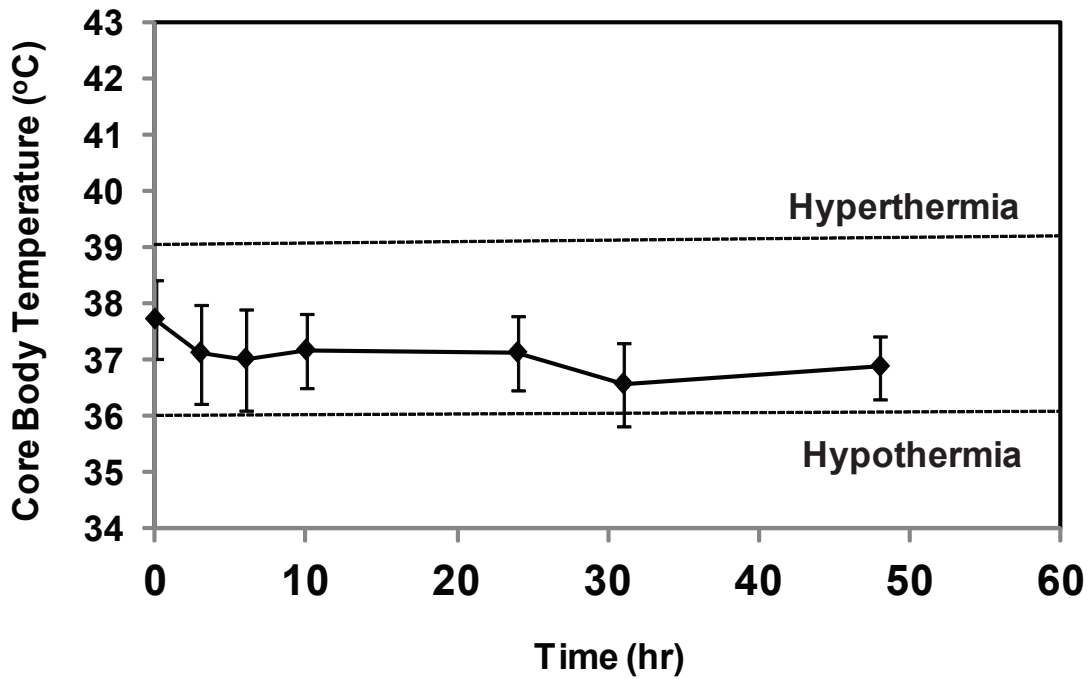

**Figure S2: Core body temperature of sentinel mice treated with SEB.** Mice were injected intravenously with 150  $\mu\text{g}/\text{mouse}$  SEB and their core body temperatures were monitored over time using temperature transponders implanted in the peritoneal cavity. Data represented is combined average of two experiments with 6 mice in each group. There was no significant difference between HSF1<sup>-/-</sup> and HSF1<sup>+/+</sup> mice.

Table S1: Genes regulated by HSF1 in T cells grouped by physiologic function.

| Gene Title                                                                         | Gene Symbol | Fold change      |         | Fold change      |         | Alias            |
|------------------------------------------------------------------------------------|-------------|------------------|---------|------------------|---------|------------------|
|                                                                                    |             | Log2 (KO37/WT37) | p-value | Log2 (KO40/WT40) | p-value |                  |
| <b>Heat shock response</b>                                                         |             |                  |         |                  |         |                  |
| heat shock protein 1B                                                              | Hspa1b      | -4.00            | 0.001   | -4.79            | <0.000  | Hsp 70.1, Hsp 70 |
| heat shock protein 1A                                                              | Hspa1a      | -3.55            | 0.003   | -4.51            | 0.001   | Hsp70.3, Hsp70   |
| heat shock protein 110                                                             | Hsp110      | -1.80            | 0.001   | -1.64            | 0.001   | ApG-2            |
| DnaJ (Hsp40) homolog, subfamily A, member 1                                        | Dnaja1      | -0.99            | 0.008   | -1.08            | 0.006   |                  |
| DnaJ (Hsp40) homolog, subfamily B, member 1                                        | Dnajb1      | -0.91            | <0.000  | -1.04            | <0.000  | Hsp 40           |
| heat shock protein 1 (chaperonin 10)                                               | Hspe1       | -0.77            | 0.009   | -0.94            | 0.004   | Hsp 10           |
| stress-induced phosphoprotein 1                                                    | Stip1       | -0.75            | 0.005   | -0.79            | 0.003   | Hop, mSTI1       |
| activator of heat shock 90kDa protein ATPase homolog 1                             | Ahsa1       | -0.74            | 0.002   | -0.85            | 0.001   |                  |
| heat shock factor 1                                                                | Hsf1        | -0.70            | 0.011   | -0.99            | 0.003   |                  |
| DnaJ (Hsp40) homolog, subfamily A, member 4                                        | Dnaja4      | -0.69            | 0.015   | -0.94            | 0.006   |                  |
| heat shock protein 8                                                               | Hspa8       | -0.54            | 0.025   | -0.68            | 0.009   | Hsc 70, Hsc71    |
| heat shock protein 1, alpha                                                        | Hspca       | -0.51            | 0.011   | -0.61            | 0.005   | Hsp 90 alpha     |
| heat shock protein 1, beta                                                         | Hspcb       | -0.38            | 0.001   | -0.50            | <0.000  | Hsp 90 beta      |
| heat-responsive protein 12                                                         | Hrsp12      | 1.14             | 0.001   | 1.16             | <0.000  |                  |
| heat shock factor 2                                                                | Hsf2        | 0.58             | 0.014   | 1.22             | 0.001   |                  |
| <b>Apoptosis</b>                                                                   |             |                  |         |                  |         |                  |
| Bcl2-associated athanogene 3                                                       | Bag3        | -1.01            | 0.005   | -1.41            | 0.002   |                  |
| clusterin                                                                          | Clu         | -0.96            | 0.004   | -0.72            | 0.008   | ApoJ             |
| caspase 6                                                                          | Casp6       | -0.50            | <0.000  | -0.75            | <0.000  |                  |
| BCL2-like 11 (apoptosis facilitator)                                               | Bcl2l11     | 0.20             | 0.117   | 0.50             | 0.003   | Bim, Bod         |
| Tnf receptor-associated factor 1                                                   | Traf1       | 0.61             | 0.005   | 0.68             | 0.004   |                  |
| Interferon regulatory factor 2, mRNA                                               | Irf2        | 0.64             | 0.023   | 1.04             | 0.006   |                  |
| caspase recruitment domain family, member 6                                        | Card6       | 0.78             | 0.002   | 0.82             | 0.002   |                  |
| caspase recruitment domain family, member 11                                       | Card11      | 0.79             | <0.000  | 0.65             | <0.000  | CARMA1           |
| <b>cell cycle</b>                                                                  |             |                  |         |                  |         |                  |
| minichromosome maintenance deficient 2 mitotin ( <i>S. cerevisiae</i> )            | Mcm2        | -0.36            | 0.022   | -0.65            | 0.001   |                  |
| G1 to S phase transition 1                                                         | Gspt1       | 0.44             | 0.008   | 0.66             | 0.003   | Gst1             |
| cell division cycle 2-like 6 (CDK8-like)                                           | Cdc2l6      | 0.61             | 0.001   | 0.78             | 0.001   | CDK11            |
| cyclin G2                                                                          | Ceng2       | 0.70             | 0.009   | 0.71             | 0.016   |                  |
| histone deacetylase 5                                                              | Hdac5       | 0.76             | 0.001   | 0.25             | 0.153   |                  |
| amyloid beta (A4) precursor protein-binding, family B, member 1                    | Apbb1       | -1.24            | 0.007   | -0.30            | 0.125   | ---              |
| Ring-box 1, mRNA                                                                   | Rbx1        | 0.10             | 0.463   | 0.74             | 0.005   |                  |
| <b>inflammation</b>                                                                |             |                  |         |                  |         |                  |
| tumor necrosis factor (ligand) superfamily, member 8                               | Tnfsf8      | -0.67            | 0.005   | -0.69            | 0.003   |                  |
| TRAF3 interacting protein 3                                                        | Traf3ip3    | 0.53             | 0.006   | 0.52             | 0.009   |                  |
| CD86 antigen                                                                       | Cd86        | 0.76             | 0.001   | 0.57             | 0.003   |                  |
| inhibitor of kappaB kinase beta                                                    | Ikbkb       | 0.46             | 0.206   | 2.15             | 0.006   | IKK2, IKKbeta    |
| nuclear factor of kappa light polypeptide gene enhancer in B-cells inhibitor, zeta | Nfkbiz      | 0.48             | 0.007   | 0.59             | 0.006   | ---              |
| nuclear factor of kappa light polypeptide gene enhancer in B-cells 2,              | Nfkb2       | 0.51             | 0.010   | 0.29             | 0.032   | p49/p100         |
| <b>cytokines and chemokines</b>                                                    |             |                  |         |                  |         |                  |
| chemokine (C-X-C motif) receptor 6                                                 | Cxcr6       | -0.58            | 0.008   | -0.73            | 0.006   |                  |
| chemokine (C-X-C motif) ligand 2                                                   | Cxcl2       | -0.98            | 0.002   | -0.63            | 0.051   |                  |
| chemokine (C-C motif) ligand 3                                                     | Ccl3        | -0.62            | 0.002   | -0.50            | 0.007   |                  |
| chemokine (C-C motif) receptor 9                                                   | Ccr9        | 0.52             | 0.003   | 0.59             | 0.001   |                  |

| Gene Title                                                                                             | Gene Symbol | Log2 (KO37/WT37) | p-value | Log2 (KO40/WT40) | p-value | Alias |
|--------------------------------------------------------------------------------------------------------|-------------|------------------|---------|------------------|---------|-------|
| interleukin 13                                                                                         | Il13        | -0.72            | 0.004   | -0.75            | 0.004   |       |
| interleukin 4                                                                                          | Il4         | -0.62            | 0.002   | -0.67            | 0.001   |       |
| interleukin 16                                                                                         | Il16        | 0.79             | <0.000  | 0.57             | <0.000  |       |
| RAR-related orphan receptor gamma                                                                      | Rorc        | -0.31            | 0.099   | -1.50            | 0.005   |       |
| Colony stimulating factor 1 receptor (Csf1r), mRNA                                                     | Csf1r       | 0.46             | 0.002   | 0.75             | 0.000   |       |
| transforming growth factor, beta receptor III                                                          | Tgfbr3      | 0.47             | 0.002   | 0.66             | 0.001   |       |
| Metabolism                                                                                             |             |                  |         |                  |         |       |
| acyl-CoA thioesterase 7                                                                                | Acot7       | -1.43            | 0.001   | -1.33            | <0.000  |       |
| galactosylceramidase                                                                                   | Galc        | -0.87            | 0.009   | -0.60            | 0.026   |       |
| sterol-C5-desaturase                                                                                   | Sc5d        | 0.33             | 0.024   | 0.58             | 0.006   |       |
| alcohol dehydrogenase 1 (class I)                                                                      | Adh1        | 0.34             | 0.005   | 0.95             | <0.000  |       |
| hydroxysteroid 11-beta dehydrogenase 1                                                                 | Hsd11b1     | 0.70             | 0.006   | 0.78             | 0.006   |       |
| cell signal                                                                                            |             |                  |         |                  |         |       |
| cellular retinoic acid binding protein II                                                              | Crabp2      | -1.68            | 0.013   | -1.95            | 0.004   |       |
| ras homolog gene family, member f                                                                      | Rhof        | -0.71            | 0.002   | -0.98            | 0.002   |       |
| protein kinase C, zeta                                                                                 | Prkcz       | -0.69            | 0.002   | -0.32            | 0.014   | Pkcz  |
| CD8 antigen, beta chain 1                                                                              | Cd8b1       | -0.45            | 0.006   | -0.80            | 0.001   |       |
| IL2-inducible T-cell kinase                                                                            | Itk         | -0.30            | 0.033   | -0.55            | 0.007   | Tsk   |
| RAN GTPase activating protein 1                                                                        | Rangap1     | -0.24            | 0.056   | -0.55            | 0.004   |       |
| Protein kinase, cAMP dependent, catalytic, alpha,                                                      | Prkaca      | 0.29             | 0.050   | 0.54             | 0.007   | PKA   |
| interferon inducible GTPase 2                                                                          | Iigp2       | 0.37             | 0.015   | 0.53             | 0.009   |       |
| dihydroipoamide S-succinyltransferase                                                                  | Dlst        | 0.45             | 0.033   | 0.78             | 0.010   |       |
| spectrin beta 2                                                                                        | S pnb2      | 0.54             | 0.005   | 0.38             | 0.023   | ---   |
| diacylglycerol kinase, alpha                                                                           | Dgka        | 0.55             | <0.000  | 0.39             | 0.002   |       |
| Diacylglycerol kinase zeta                                                                             | Dgkz        | 0.57             | 0.004   | 0.32             | 0.021   |       |
| phosphatidylinositol 3-kinase catalytic delta polypeptide                                              | Pik3cd      | 0.62             | 0.009   | 0.47             | 0.019   |       |
| inositol polyphosphate-1-phosphatase                                                                   | Inpp1       | 0.66             | 0.001   | 0.62             | 0.001   |       |
| mitogen activated protein kinase kinase kinase kinase 2                                                | Map4k2      | 0.67             | 0.005   | 0.59             | 0.016   |       |
| Mitogen activated protein kinase kinase 2 (Map2k2)                                                     | Map2k2      | 0.71             | 0.006   | 0.19             | 0.193   |       |
| Rho GTPase activating protein 24                                                                       | Arhgap24    | 0.71             | 0.005   | 0.64             | 0.012   |       |
| signal transducer and activator of transcription 2                                                     | Stat2       | 0.72             | <0.000  | 0.81             | <0.000  |       |
| phosphoinositide-3-kinase adaptor protein 1                                                            | Pik3ap1     | 0.77             | 0.001   | 0.89             | 0.001   | BCAP  |
| protein kinase inhibitor, gamma                                                                        | Pkig        | 0.77             | 0.003   | 0.84             | 0.004   |       |
| RAS p21 protein activator 3                                                                            | Rasa3       | 0.79             | 0.001   | 0.72             | 0.003   |       |
| diacylglycerol O-acyltransferase 1                                                                     | Dgat1       | 0.80             | 0.003   | 0.61             | 0.009   |       |
| rho/rac guanine nucleotide exchange factor (GEF) 18                                                    | Arhgef18    | 0.80             | 0.007   | 1.02             | 0.010   |       |
| Protein tyrosine phosphatase, non-receptor type 22 (lymphoid) (Ptpn22), mRNA                           | Ptpn8       | 0.99             | 0.008   | 0.65             | 0.029   |       |
| Tyrosine 3-monooxygenase/tryptophan 5-monooxygenase activation protein, zeta polypeptide (Ywhaz), mRNA | Ywhaz       | 3.93             | <0.000  | 3.21             | 0.001   |       |
| Transcription and translation                                                                          |             |                  |         |                  |         |       |
| polymerase (RNA) II (DNA directed) polypeptide K                                                       | Polr2k      | -1.66            | 0.002   | -1.42            | 0.002   |       |
| general transcription factor II I                                                                      | Gtf2i       | -0.77            | 0.007   | -0.35            | 0.114   |       |
| Eukaryotic translation initiation factor 2C, 1 (Eif2c1), mRNA                                          | Eif2c1      | -0.29            | 0.403   | -2.71            | 0.008   |       |
| General transcription factor IIB (Gtf2b), mRNA                                                         | Gtf2b       | 0.78             | 0.099   | 2.69             | 0.006   |       |
| polymerase (DNA directed), gamma                                                                       | Polg        | 1.46             | 0.009   | 1.42             | 0.007   |       |
| ubiquitin specific peptidase 11                                                                        | Usp11       | 0.46             | 0.006   | 0.67             | 0.003   |       |
| proteasome (prosome, macropain) subunit, alpha type 1                                                  | Psm1        | 0.36             | 0.027   | 0.58             | 0.005   |       |
